# Supplementary material
Source: Springer Nature journal article supplement (https://www.springermedizin.de/resource/supplementary/13023_2013_743_MOESM1_ESM.pdf/9642982)
Supplement: MOESM1 [file 9642982]

All patients  
n = 1744<sup>a</sup>  
(55% males)

TTR mutations  
n = 1579<sup>b</sup>  
(51% males)

Biopsy proven  
wt-ATTR amyloidosis  
n = 120  
(94% males)

Symptomatic  
n = 1219  
(53% males)

Asymptomatic  
n = 328  
(41% males)

Biopsy proven  
n = 677  
(61% males)

Not biopsy proven  
n = 542  
(44% males)
